# Supplementary material for: Strong anodic electrochemiluminescence from dissolved oxygen with 2-(dibutylamino) ethanol for glucose oxidase assay
Source: Royal Society of Chemistry journal article supplement (doi:10.1039/c4ra05363j), 2014-01-01
Supplement: c4ra05363j1.pdf [file c4ra05363j1.pdf]

## Supporting Information

### Strong Anodic Electrochemiluminescence from Dissolved Oxygen with 2-(Dibutylamino) ethanol for Glucose Oxidase Assay

Shou-Nian Ding,\* Chun-Lan Zheng and Osman Kargbo

*School of Chemistry and Chemical Engineering, Southeast University, 211189  
Nanjing, China.*

*\*Corresponding Author. Fax: +86-25-52090621; Tel: +86-25-52090621; E-mail:  
sning@seu.edu.cn*

#### Chemicals and solutions

2-(Dibutylamino) ethanol (DBAE, 99%) was purchased from Sigma-Aldrich. Tri-*n*-propylamine (TPrA) was purchased from Aladdin (Shanghai, China). Glucose oxidase (GOD, >100U/mg) was obtained from Sangon Biotech Co. Ltd. (Shanghai, China). D-(+)-Glucose (C<sub>6</sub>H<sub>12</sub>O<sub>6</sub>·H<sub>2</sub>O) was purchased from Shanghai Sinopharm Chemical Reagent Co. Ltd. (Shanghai, China). Phosphate buffer solutions (PBS, 0.1 M) were prepared by varying the ratio of Na<sub>2</sub>HPO<sub>4</sub> to NaH<sub>2</sub>PO<sub>4</sub>·2H<sub>2</sub>O. Double distilled water was used throughout.

#### The physical images of the detection equipment

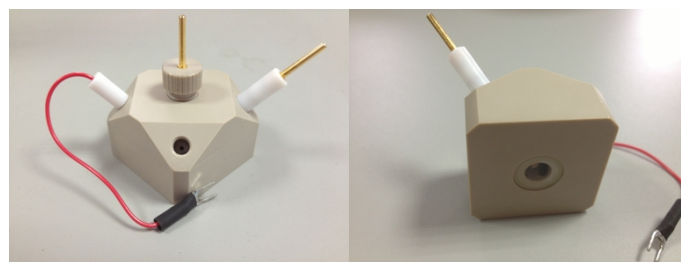

**Fig. S1** The photograph of the ECL cell taken from the top (the left) and the bottom (the right).

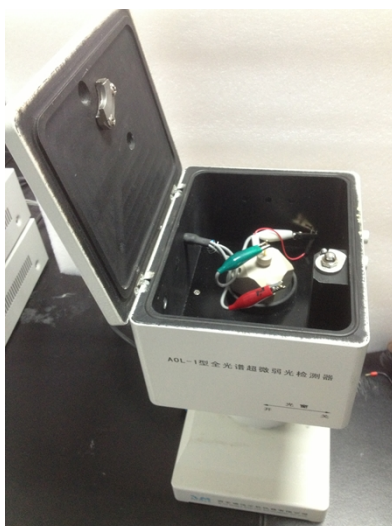

**Fig. S2** The photograph of ECL cell located upon the PMT on a black box.

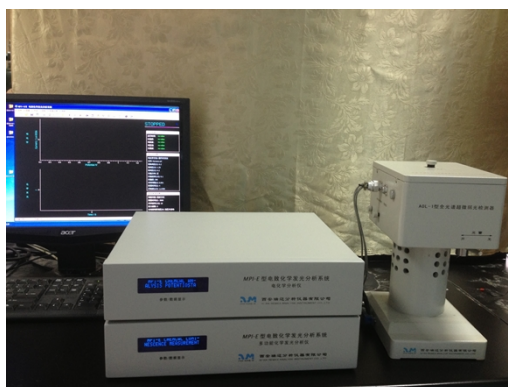

**Fig. S3** The photograph of our detection equipment.
